# Supplementary material
Source: Research Square preprint supplement (doi:10.21203/rs.3.rs-8943225/v1)
Supplement: Supplementary file 1 [file 17195a6c0d04c15fc1e31b3f.docx]

**Electronic Supplementary File (ESF)**

Lower insulin resistance in Chinese patients with severe major depressive disorder: associations with the inflammatory response

Yueyang Luo, Mengqi Niu, Tangcong Chen, Jing Li, Abbas F. Almulla, Yingqian Zhang, Michael Maes.

ESF Methods S1. Construction of Pure Symptom Scores and Composite Severity Index

To minimize the confounding effects of overlapping somatic symptoms across clinical rating scales, domain-specific “pure” symptom scores were constructed. The pure depression score (pure HAMD) was calculated by summing HAMD items specifically reflecting core depressive symptoms, including depressed mood, guilt, suicidal ideation, and loss of interest, while excluding somatic and vegetative items.

The pure anxiety score (pure HAMA) was computed using items assessing psychic anxiety, tension, fear, and anxious behavior, excluding somatic anxiety items. Self-reported anxiety was assessed using the state version of the State-Trait Anxiety Inventory (STAI-state). The pure fibrofatigue (pure FF) score was derived by summing standardized z-scores of FF items reflecting muscle pain, muscle tension, flu-like malaise, fatigue, headache, autonomic symptoms, and gastrointestinal complaints.

To generate an integrated index reflecting overall clinical severity, a composite score representing the overall severity of depression (OSOD) was calculated by summing the z-scores of pure HAMD, pure HAMA, pure STAI, and pure FF scores. Higher OSOD values indicate greater overall affective–somatic symptom severity.

ESF Methods S2. Definition of Metabolic Syndrome and Body Composition Index

Metabolic syndrome (MetS) was defined according to the 2009 Joint Scientific Statement of the American Heart Association, National Heart, Lung, and Blood Institute, and related organizations. Participants were classified as having MetS if they met at least three of the following five criteria: (1) triglycerides ≥ 150 mg/dL; (2) waist circumference ≥ 90 cm for men or ≥ 80 cm for women; (3) systolic blood pressure ≥ 130 mmHg and/or diastolic blood pressure ≥ 85 mmHg or current antihypertensive treatment; (4) HDL cholesterol < 40 mg/dL for men or < 50 mg/dL for women; and (5) fasting plasma glucose ≥ 100 mg/dL or a diagnosis of diabetes.

To capture overall body composition, a composite index was constructed by summing standardized z-scores of BMI and waist circumference (z BMI + z WC), with higher values indicating greater adiposity.

ESF Methods S3. Laboratory Assays and Analytical Characteristics

Venous blood samples were obtained after an overnight fast between 6:30 and 8:00 a.m. Serum and plasma were separated by centrifugation and stored at −80 °C until analysis.

Fasting plasma glucose was measured using the glucose oxidase method on a fully automated biochemical analyzer. Serum insulin concentrations were determined using a direct chemiluminescence immunoassay. Serum triglycerides were measured using the glycerol-3-phosphate oxidase–peroxidase (GPO-PAP) method, and HDL cholesterol was assayed using a selective inhibition method. Serum albumin was quantified using the bromocresol green method, and serum transferrin was measured by immunoturbidimetric assay.

All assays were performed using commercially available kits following manufacturers’ instructions. Intra-assay and inter-assay coefficients of variation for all biomarkers were within acceptable analytical ranges. Detailed information on assay manufacturers, instrumentation, and analytical performance is available upon request.

ESF Methods S4. Statistical Procedures and Model Diagnostics

Prior to analysis, data distributions were examined for normality. When necessary, variables were log-transformed, square-root transformed, rank-transformed, or Winsorized to meet model assumptions. Pearson correlation coefficients were used to assess associations between continuous variables.

General linear models (GLM) were used to compare metabolic biomarkers between groups while adjusting for potential confounders. Binary logistic regression analyses were conducted to identify predictors of MDD status, and multiple linear regression analyses were performed to examine predictors of metabolic biomarkers and clinical severity scores. Both manual and automated stepwise procedures were applied, with entry and removal criteria set at p = 0.05 and p = 0.07, respectively, to minimize overfitting.

Heteroskedasticity was assessed using the White test and the modified Breusch–Pagan test. Multicollinearity was evaluated using tolerance values and variance inflation factors (VIF). False discovery rate (FDR) correction was applied to control for multiple testing where appropriate. All statistical analyses were two-tailed with a significance threshold of p < 0.05.

ESF Table 1. Differences in insulin biomarkers between subjects with and without metabolic syndrome (MetS).

| Variables | With MetS | Without MetS | F | df | P |
| --- | --- | --- | --- | --- | --- |
| FPG (mmol/L) | 5.748 (0.094) | 5.167 (0.047) | 28.65 | 1/157 | < 0.001 |
| Insulin (mU/L) | 9.691 (0.655) | 6.064 (0.327) | 23.16 | 1/157 | < 0.001 |
| z FPG + z INS | 1.016 (0.156) | -0.124 (0.078) | 40.14 | 1/157 | < 0.001 |
| z INS - z GLU | -0.059 (0.202) | -0.012 (0.101) | 0.04 | 1/157 | 0.842 |
| HOMA2-IR | 1.299 (0.086) | 0.797 (0.043) | 25.67 | 1/157 | < 0.001 |
| HOMA2-IS | 104.944 (15.550) | 157.242 (7.760) | 8.55 | 1/157 | 0.004 |
| HOMA2-β | 81.507 (4.716) | 74.047 (2.353) | 1.89 | 1/157 | 0.171 |
| QUICKI | 0.344 (0.006) | 0.373 (0.003) | 16.59 | 1/157 | < 0.001 |
| TyG | 13.047 (0.666) | 6.040 (0.332) | 83.75 | 1/157 | < 0.001 |

Data are presented as marginal estimated mean (SE); F and P values were derived from GLM adjusted for body mass index and age, without MetS; df: degrees of freedom are reported for each F-test.

FPG: fasting plasma glucose, INS: insulin, GLU: glucose, HOMA2-IR: Homeostasis Model Assessment of Insulin Resistance, HOMA2-IS: Homeostasis Model Assessment of Insulin Sensitivity, HOMA2-β: Homeostasis Model Assessment of β-cell Function, QUICKI: quantitative insulin sensitivity check index, TyG: triglyceride-glucose index, MetS: Metabolic syndrome.
